# Supplementary material for: Fe-doped Beta zeolite from organotemplate-free synthesis for NH3-SCR of NOx
Source: Royal Society of Chemistry journal article supplement (doi:10.1039/c6cy00231e), 2016-01-01
Supplement: c6cy00231e1.pdf [file c6cy00231e1.pdf]

## Supplementary Material

### Fe-doped Beta Zeolite from Organotemplate-free Synthesis for NH<sub>3</sub>-SCR of NO<sub>x</sub>

Yongjun Zhu<sup>a</sup>, Bingbing Chen<sup>a</sup>, Rongrong Zhao<sup>a</sup>, Qi Zhao<sup>a</sup>, Hermann Gies<sup>b</sup>, Feng-Shou Xiao<sup>c</sup>, Dirk De Vos<sup>d</sup>, Toshiyuki Yokoi<sup>e</sup>, Xinhe Bao<sup>f</sup>, Ute Kolb<sup>g</sup>, Mathias Feyen<sup>h</sup>, Stefan Maurer<sup>h</sup>, Ahmad Moini<sup>i</sup>, Ulrich Müller<sup>h</sup>, Chuan Shi<sup>a,\*</sup>, Weiping Zhang<sup>a,\*</sup>

<sup>a</sup>*State Key Laboratory of Fine Chemicals, School of Chemistry, Dalian University of Technology, Dalian 116024, China*

<sup>b</sup>*Institute für Geologie, Mineralogie und Geophysik, Ruhr-Universität Bochum, Germany*

<sup>c</sup>*Department of Chemistry, Zhejiang University, Hangzhou 310028, China*

<sup>d</sup>*Centre for Surface Chemistry and Catalysis, K. U. Leuven, Leuven, Belgium*

<sup>e</sup>*Chemical Resources Laboratory, Tokyo Institute of Technology, Yokohama, Japan*

<sup>f</sup>*State Key Laboratory of Catalysis, Dalian Institute of Chemical Physics, Dalian 116023, China*

<sup>g</sup>*Institut für Physikalische Chemie, Johannes Gutenberg-Universität Mainz, 55128 Mainz, Germany*

<sup>h</sup>*BASF SE, Process Research and Chemical Engineering, 67056 Ludwigshafen, Germany*

<sup>i</sup>*BASF Corporation, Catalysts LLC, Iselin, NJ 08830, USA*

---

Table S1 Compositions of the as-prepared catalysts.

| Catalysts      | Fe content (wt %) | Si/Al | Catalysts       | Fe content (wt %) | Si/Al |
|----------------|-------------------|-------|-----------------|-------------------|-------|
| H-Beta-9       | —                 | 9     | H-Beta-19       | —                 | 19    |
| Fe(0.2)-Beta-9 | 0.2               | 9     | Fe(0.1)-Beta-19 | 0.1               | 19    |
| Fe(1.3)-Beta-9 | 1.3               | 9     | Fe(1.4)-Beta-19 | 1.4               | 19    |
| Fe(2.1)-Beta-9 | 2.1               | 9     | Fe(2.3)-Beta-19 | 2.3               | 19    |
| Fe(5.4)-Beta-9 | 5.4               | 9     | Fe(5.7)-Beta-19 | 5.7               | 19    |

Table S2 Comparison of NO conversion rate at 150 °C for the as-prepared and literature reported catalysts

| Index                                                  | Catalyst          | Conditions                                                                                                                 | Temperature/°C | Rate/mol <sub>(NO<sub>x</sub>)</sub> g <sub>(cat.)</sub> <sup>-1</sup> s <sup>-1</sup> |
|--------------------------------------------------------|-------------------|----------------------------------------------------------------------------------------------------------------------------|----------------|----------------------------------------------------------------------------------------|
| Our work                                               | <b>Fe-Beta-9</b>  | <b>500 ppm NO, 500 ppm NH<sub>3</sub>, 10% O<sub>2</sub>, N<sub>2</sub> balance</b>                                        | <b>150</b>     | <b>5.00×10<sup>-7</sup></b>                                                            |
| Our work                                               | <b>Fe-Beta-19</b> | <b>500 ppm NO, 500 ppm NH<sub>3</sub>, 10% O<sub>2</sub>, N<sub>2</sub> balance</b>                                        | <b>150</b>     | <b>2.31×10<sup>-7</sup></b>                                                            |
| Applied Catalysis B: Environmental<br>164(2015)407-419 | Fe-SSZ-13         | 350 ppm NO, 350 ppm NH <sub>3</sub> , 14% O <sub>2</sub> , N <sub>2</sub> balance                                          | 150            | 9.11×10 <sup>-8</sup>                                                                  |
| Catalysis Science & Technology,<br>4(2014)1350-1356    | Fe-BEA            | 500 ppm NO, 500 ppm NH <sub>3</sub> , 5% O <sub>2</sub> , 8% CO <sub>2</sub> , 5% H <sub>2</sub> O, N <sub>2</sub> balance | 150            | 1.78×10 <sup>-7</sup>                                                                  |
| Applied Catalysis B: Environmental<br>91(2009)587-595  | Fe-BEA            | 500 ppm NO, 500 ppm NH <sub>3</sub> , 5% O <sub>2</sub> , N <sub>2</sub> balance                                           | 150            | 1.58×10 <sup>-7</sup>                                                                  |
| Chemical Engineering Journal<br>209(2012)652-660       | Fe-BEA            | 500 ppm NO, 500 ppm NH <sub>3</sub> , 5% O <sub>2</sub> , N <sub>2</sub> balance                                           | 150            | 4.46×10 <sup>-7</sup>                                                                  |
| Applied Catalysis B: Environmental<br>85(2009)109-119  | Fe-BEA            | 500 ppm NO, 500 ppm NH <sub>3</sub> , 5% O <sub>2</sub> , N <sub>2</sub> balance                                           | 150            | 1.58×10 <sup>-7</sup>                                                                  |
| Catalysis Science & Technology,<br>4(2014)3917-3626    | Fe-SSZ-13         | 400 ppm NO, 400 ppm NH <sub>3</sub> , 8% O <sub>2</sub> , Ar balance                                                       | 150            | 5.67×10 <sup>-8</sup>                                                                  |
| Catalysis Today<br>235(2014)210-225                    | Fe-BEA            | [NO] = [NH <sub>3</sub> ] = 0.25 vol.%, [O <sub>2</sub> ] = 2.5 vol.% and [He] = 97 vol.%                                  | 150            | 0                                                                                      |
| Chemical Engineering Journal<br>262(2015)1199-1207     | Fe-ZSM-5          | 1000 ppm NO <sub>x</sub> , 1000 ppm NH <sub>3</sub> , 5% O <sub>2</sub> , N <sub>2</sub> balance                           | 150            | 4.69×10 <sup>-8</sup>                                                                  |

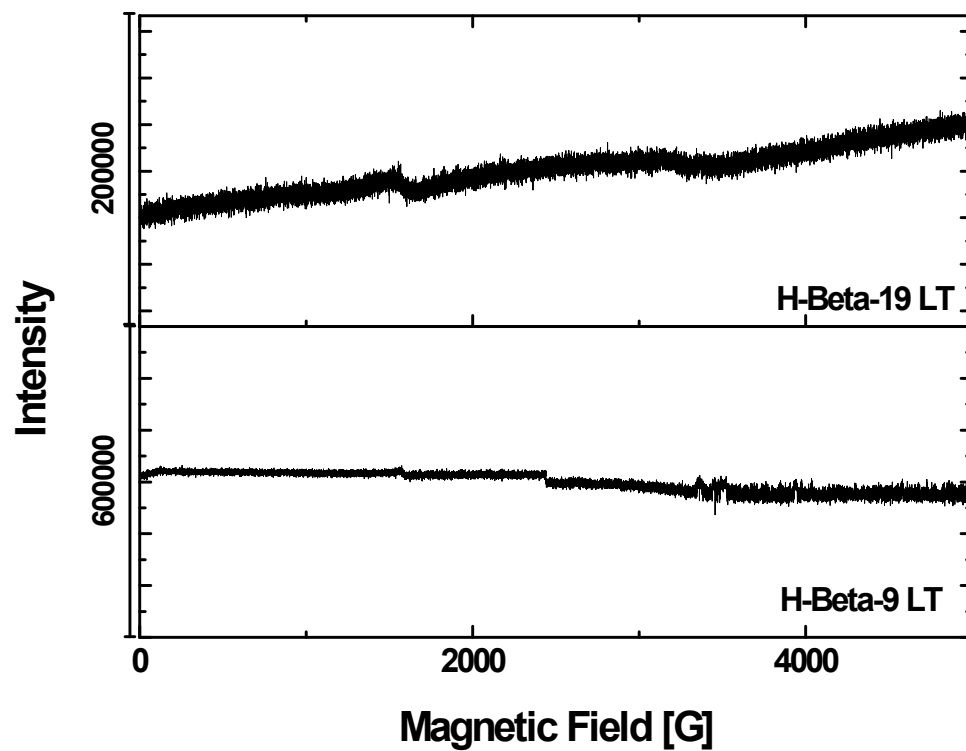

Fig. S1 EPR spectra of H-Beta-9 and H-Beta-19 catalysts measured at -196 °C.

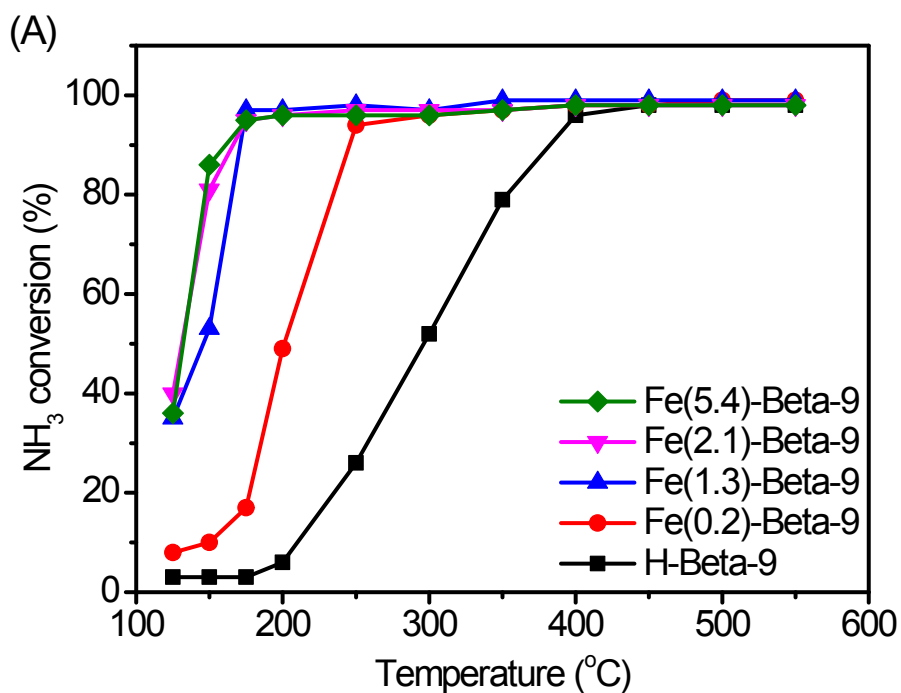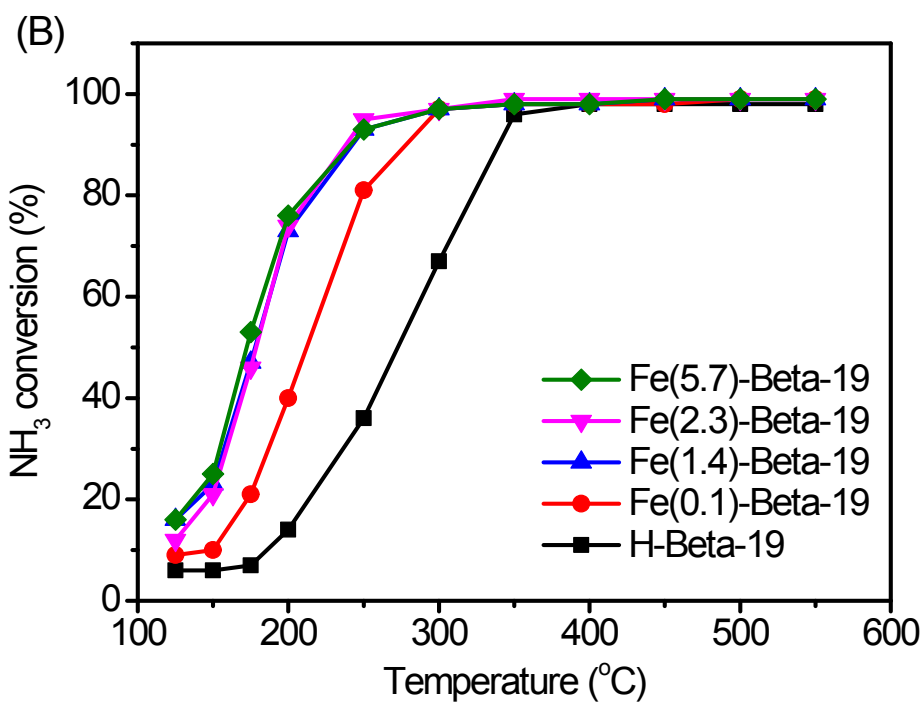

Fig. S2  $\text{NH}_3$  conversion as a function of temperature on both Fe-Beta-9(A) and Fe-Beta-19(B) series catalysts. Conditions:  $\text{NO}$  500 ppm;  $\text{NH}_3$  500 ppm,  $\text{O}_2$  10%, balance  $\text{N}_2$ ; GHSV=80000  $\text{h}^{-1}$ .

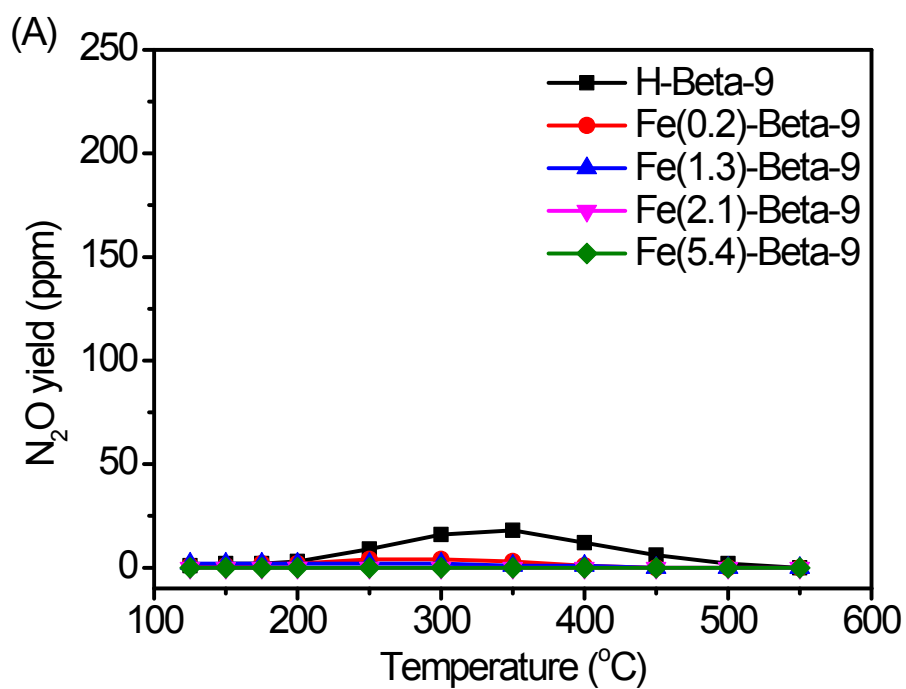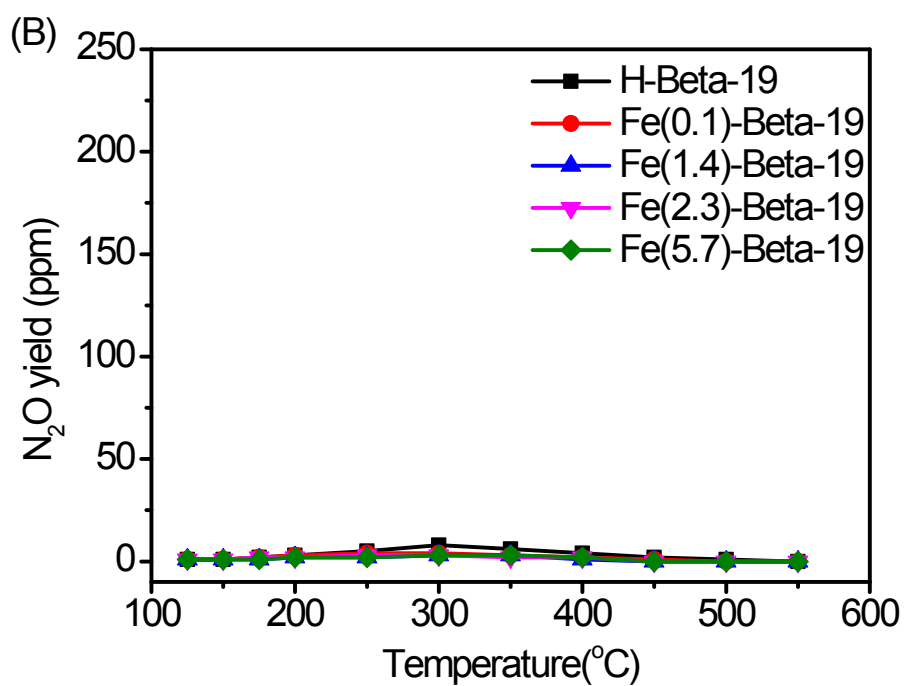

Fig. S3 N<sub>2</sub>O yield as a function of temperature on both Fe-Beta-9(A) and Fe-Beta-19(B) series catalysts. Conditions: NO 500 ppm; NH<sub>3</sub> 500 ppm, O<sub>2</sub> 10%, balance N<sub>2</sub>; GHSV=80000 h<sup>-1</sup>.

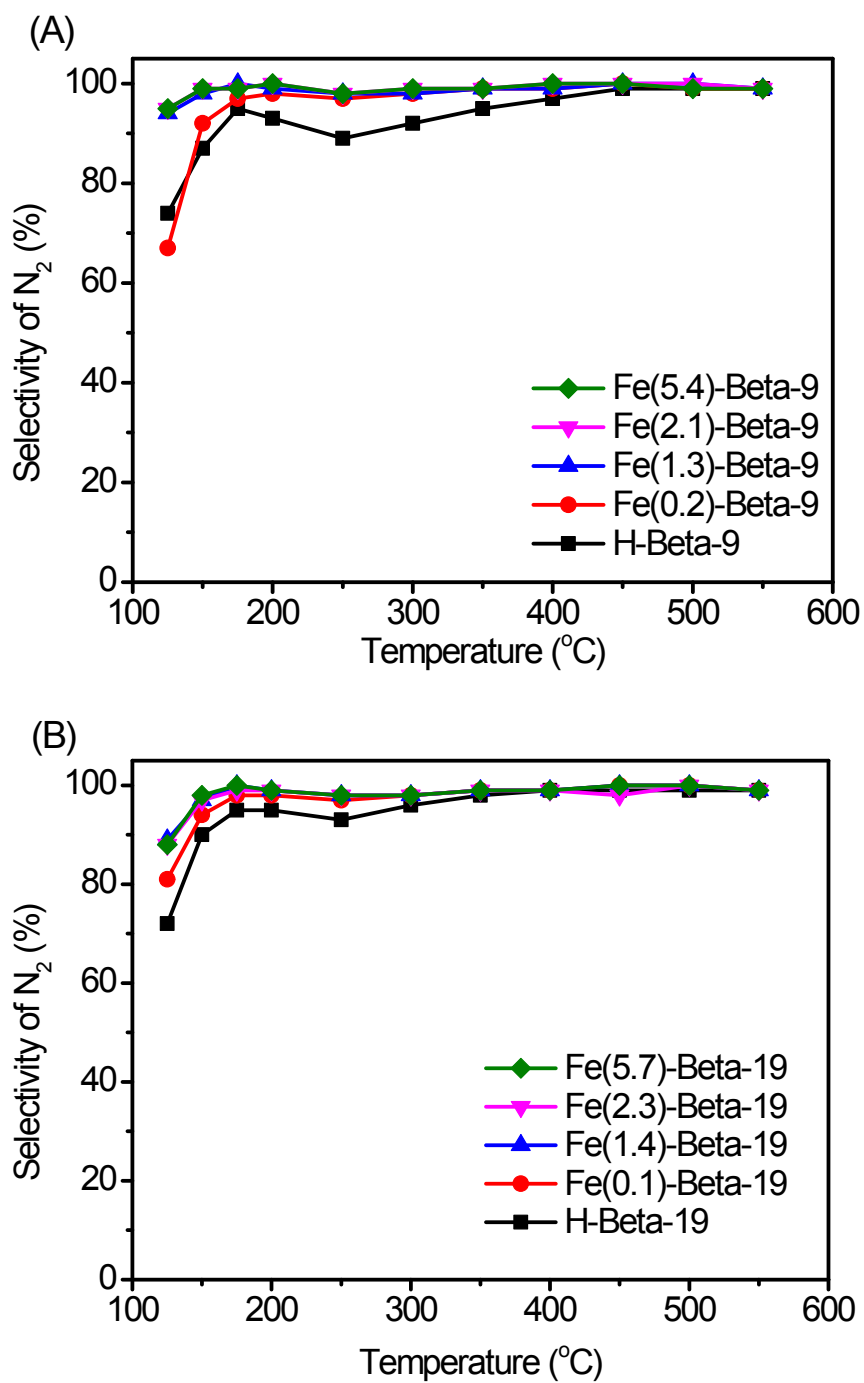

Fig. S4 Selectivity to N<sub>2</sub> in the course of the NH<sub>3</sub>-SCR reaction over Fe-Beta-9 (A) and Fe-Beta-19 (B) series catalysts. Conditions: NO 500 ppm; NH<sub>3</sub> 500 ppm, O<sub>2</sub> 10%, balance N<sub>2</sub>; GHSV=80000 h<sup>-1</sup>.

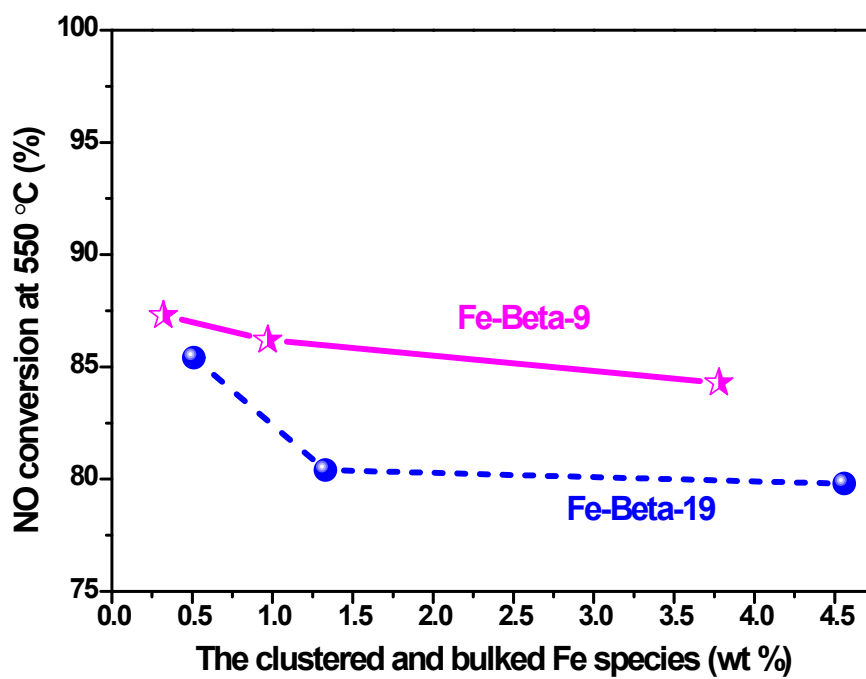

Fig. S5 Correlations of NO conversion at 550 °C as a function of clustered and bulked Fe species content of Fe-Beta-9 and Fe-Beta-19 series catalysts.



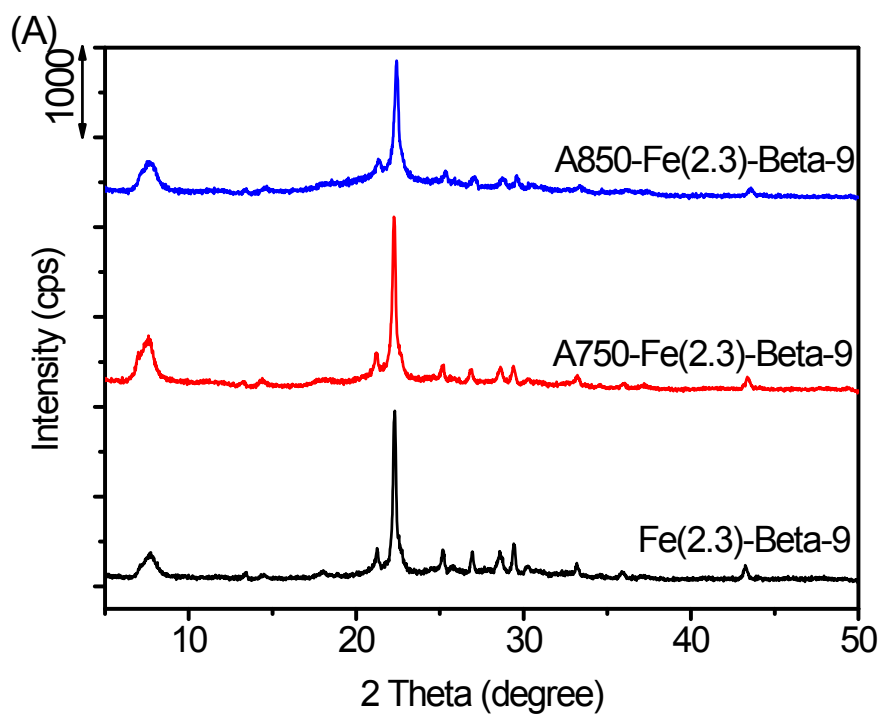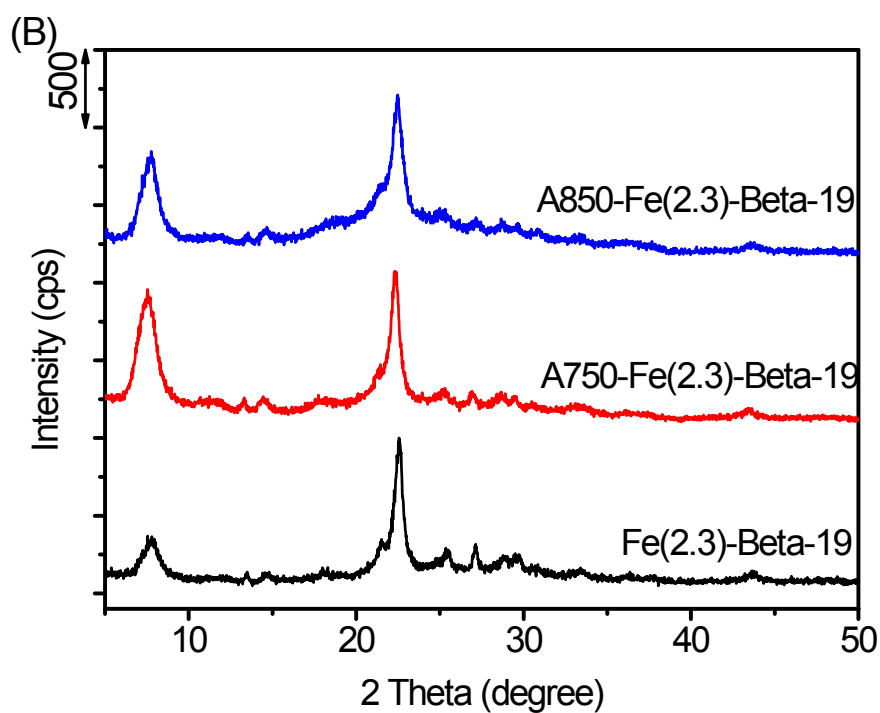

Fig. S6 XRD patterns of both Fe-Beta-9(A) and Fe-Beta-19(B) series catalysts. Where “A750, A850” are denoted that the catalyst have been treated under 10 % H<sub>2</sub>O vapor /Ar at 750 °C and 850 °C for 10 h, respectively.

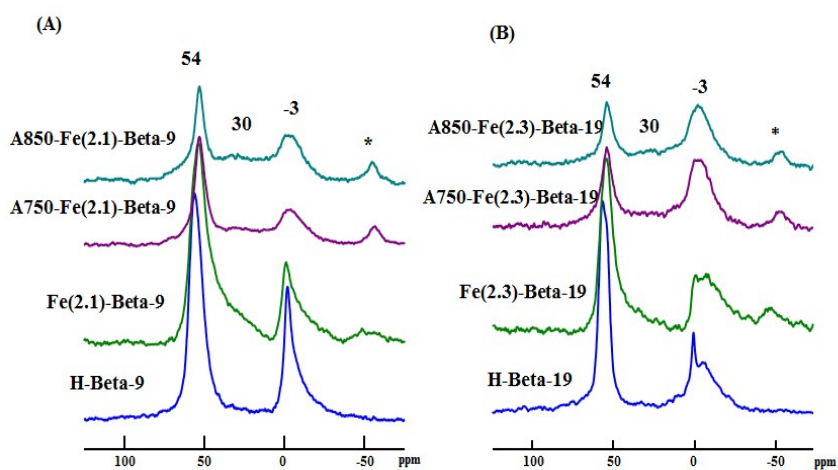

Fig. S7  $^{27}\text{Al}$  MAS NMR spectrum of Fe(2.1)-Beta-9(A) and Fe(2.3)-Beta-19 series catalysts. Where “A750, A850” are denoted that the catalyst have been treated under 10 %  $\text{H}_2\text{O}$  vapor /Ar at 750 °C and 850 °C for 10 h, respectively.

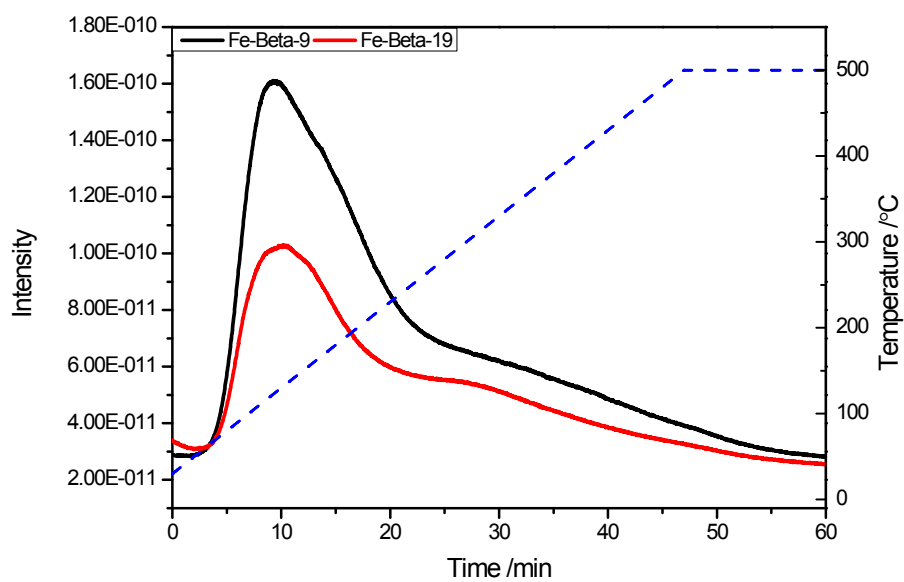

Fig. S8 NH<sub>3</sub>-TPD profiles of the indicated catalysts with ammonia adsorbed at RT for 60 min, temperature ramping rate: 10 °C/min.
